# Supplementary material for: Metabolic pathway inference using multi-label classification with rich pathway features
Source: PubMed Central journal article supplement (PMC7529316; doi:10.1371/journal.pcbi.1008174), 2020-10-01
Supplement: pcbi.1008174.s001.pdf [file pcbi.1008174.s001.pdf]

# Supplementary - Analytical Expression of mLGPR

Abdur Rahman M. A. Basher, Ryan J. McLaughlin, and Steven J. Hallam

Here, we present analytical expression of mLGPR model in Section 1.

## 1 Mathematical Derivations

We outline the process of deriving the objective cost function. The target function in our proposed model is the logistic regression, which represents the conditional probabilities through a non-linear logistic function  $f(\cdot)$  defined as:

$$f(\theta_j, \Phi(\mathbf{x}_i)) = p(\mathbf{y}_{i,j} = 1 | \Phi(\mathbf{x}_i); \theta_j) = \frac{\exp(\theta_j^\top \Phi(\mathbf{x}_i))}{\exp(\theta_j^\top \Phi(\mathbf{x}_i)) + 1} \quad (1)$$

where  $\mathbf{y}_{i,j}$  is the  $j$ -th element of the label vector  $\mathbf{y}_i$  and  $\theta_j$  is a  $m$ -dimensional weight vector for the  $j$ -th pathway that describes the space of  $f(\cdot)$  mapping from  $\mathbb{R}^m$  to  $2^{\mathcal{Y}}$  (a set of pathway space with  $t$  possible pathways). The  $\Phi(\mathbf{x}_i)$  is the (collective) transformation function that maps an instance  $\mathbf{x}_i$  from  $\mathbb{R}^d$  to a  $\mathbb{R}^m$  dimensional vector. The Eq 1 can be written in more a compact form as:

$$p(\mathbf{y}_{i,j} | \Phi(\mathbf{x}_i); \theta_j) = f(\theta_j, \Phi(\mathbf{x}_i))^{\mathbf{y}_{i,j}} (1 - f(\theta_j, \Phi(\mathbf{x}_i)))^{1 - \mathbf{y}_{i,j}} \quad (2)$$

Given  $n$  training samples, the average likelihood of the  $j$ -th space parameters can be written as:

$$\begin{aligned} l(\theta_j) &= p(\mathbf{Y} | \Phi(\mathbf{X}); \theta_j) \\ &= \frac{1}{n} \prod_{i=1}^n p(\mathbf{y}_{i,j} | \Phi(\mathbf{x}_i); \theta_j) \\ &= \frac{1}{n} \prod_{i=1}^n (f(\theta_j, \Phi(\mathbf{x}_i))^{\mathbf{y}_{i,j}} (1 - f(\theta_j, \Phi(\mathbf{x}_i)))^{1 - \mathbf{y}_{i,j}}) \end{aligned} \quad (3)$$

where  $\Phi(\mathbf{X}) = [\Phi(\mathbf{x}_1), \Phi(\mathbf{x}_2), \dots, \Phi(\mathbf{x}_n)]^\top \in \mathbb{R}^{n \times m}$  represents the design matrix and  $\mathbf{Y} = [\mathbf{y}_1, \mathbf{y}_2, \dots, \mathbf{y}_n]^\top$  is the label matrix. Taking the log-likelihood of the Eq 3 results in the following cost function:

$$ll(\theta_j) = \frac{1}{n} \sum_{i=1}^n (\mathbf{y}_{i,j} \theta_j^\top \Phi(\mathbf{x}_i) - \log(1 + \exp(\theta_j^\top \Phi(\mathbf{x}_i)))) \quad (4)$$

For  $t$  pathways, we define the models weights matrix  $\Theta = [\theta_1, \theta_2, \dots, \theta_t]$  of size  $m \times t$ , and is estimated by maximizing the cost function from datasets. Thus, the Eq 4 can be generalized to  $t$  pathways as:

$$C(\Theta) = \max_{\Theta} ll(\Theta) \quad (5)$$

Because jointly estimating  $\Theta$  of Eq 5 in a straightforward way is intractable, we rather solve each weight vector  $\theta_j$  of  $\Theta$ , individually. This optimization process is referred to as a *local optimization* technique:

$$C(\theta_j) = \max_{\theta_j} ll(\theta_j) \quad (6)$$

After adding a regularization term  $\Omega(\theta_j)$  into Eq 6 and dropping the maximized term for notations brevity, the following objective function:

$$C(\theta_j) = ll(\theta_j) - \lambda \Omega(\theta_j) \quad (7)$$

The  $\Omega(\theta_j)$  penalty term is an elastic-net, which is composed of two regularizers, namely  $L_1$  and  $L_2$ , and plugging these two terms into Eq 7 we obtain:

$$C(\theta_j) = ll(\theta_j) - \lambda \left( \frac{1 - \alpha}{2} \|\theta_j\|_2^2 + \alpha \|\theta_j\|_1 \right) \quad (8)$$

where  $\|\theta_j\|_2^2$  represents the  $L_2$  regularizer while the term  $\|\theta_j\|_1$  is  $L_1$  regularizer. Both terms are controlled by  $\alpha$ . The  $\lambda > 0$  is a hyper-parameter that controls the trade-off between  $ll(\theta_j)$  and the two regularization terms.

Now, we want to choose  $\theta_j$  so as to maximize  $C(\theta_j)$ . There are many optimizers to solve the cost function including coordinate descent algorithm (CD) [1]. However, we adopt mini-batch gradient descent (GD) (ascent in our adopted definition) ([2]) that converges much faster than CD [3]. The GD starts with some initial random guess for  $\theta_j$ , and repeatedly performs update to maximize the cost function  $C(\theta_j)$ , until the algorithm converges or reaches to a cutoff threshold:

$$\theta_j^{u+1} = \theta_j^u + \eta \left( \frac{\partial}{\partial \theta_j} C(\theta_j) \right) \quad (9)$$

Here,  $\eta$  is called the learning rate and  $u$  represents the current step. The update is simultaneously performed for all values of  $j$ , i.e.,  $(\theta_{j,1}, \theta_{j,2}, \dots, \theta_{j,m})$ . This is a very natural algorithm that repeatedly takes a step in the direction of steepest maximizing  $C(\theta_j)$ . To update the learning parameters, we take the partial derivatives on the right-hand side of the above equation. However, the rightmost term in Eq 8 is non-differentiable, making the equation non-smooth. As such, we resort to solve the Eq 8 with the  $L_1$  and  $L_2$  penalties, separately. The first two terms in the right part of Eq 8 are convex and differentiable. Let us denote the right part of Eq 8 as:

$$C_s(\theta_j) = ll(\theta_j) - \lambda \frac{1-\alpha}{2} \|\theta_j\|_2^2 \quad (10)$$

Taking the first-order derivative with respect to  $\theta_j$  for Eq 10, we obtain the following formula:

$$\begin{aligned} \frac{\partial}{\partial \theta_j} E_s(\theta_j) &= \frac{\partial}{\partial \theta_j} (ll(\theta_j) - \lambda \frac{1-\alpha}{2} \|\theta_j\|_2^2) \\ &= \frac{\partial}{\partial \theta_j} \left( \frac{1}{n} \sum_{i=1}^n (\mathbf{y}_{i,j} \theta_j^\top \Phi(\mathbf{x}_i) - \log(1 + \exp(\theta_j^\top \Phi(\mathbf{x}_i)))) \right. \\ &\quad \left. - \lambda(1-\alpha)\theta_j \right) \\ &= \frac{1}{n} \sum_{i=1}^n \left( \frac{\partial}{\partial \theta_j} (\mathbf{y}_{i,j} \theta_j^\top \Phi(\mathbf{x}_i) - \log(1 + \exp(\theta_j^\top \Phi(\mathbf{x}_i)))) \right. \\ &\quad \left. - \lambda(1-\alpha)\theta_j \right) \\ &= \frac{1}{n} \sum_{i=1}^n \Phi(\mathbf{x}_i) (\mathbf{y}_{i,j} - f(\theta_j, \Phi(\mathbf{x}_i))) - \lambda(1-\alpha)\theta_j \end{aligned} \quad (11)$$

Because  $\theta_{j,k} \neq 0$  in the rightmost term of Eq 8, we use the following definition to obtain the gradient [4]:

$$\frac{\partial(-\lambda\alpha\|\theta_j\|_1)}{\partial \theta_j} = \begin{cases} \lambda\alpha & \text{if } \theta_{j,k} > 0 \\ -\lambda\alpha & \text{if } \theta_{j,k} < 0 \end{cases} \quad (12)$$

Denoting  $\text{sign}(\theta_j)$  as the sign of the parameter vector  $\theta_j$ , the first order derivative of the rightmost in Eq 12 can be revised as:

$$\frac{\partial(-\lambda\alpha\|\theta_j\|_1)}{\partial \theta_j} = -\lambda\alpha \text{sign}(\theta_j) \quad (13)$$

Replacing Eq 11 and 13 in Eq 8, the first order derivatives of the objective cost function with respect to  $\theta_j$  is:

$$\frac{\partial}{\partial \theta_j} C(\theta_j) = \frac{1}{n} \sum_{i=1}^n \Phi(\mathbf{x}_i) [\mathbf{y}_{i,j} - f(\theta_j, \Phi(\mathbf{x}_i))] - \lambda[(1-\alpha)\theta_j + \alpha \text{sign}(\theta_j)] \quad (14)$$

Putting Eq 14 into Eq 9, we obtain the final update algorithm:

$$\theta_j^{u+1} = \theta_j^u + \eta \left( \frac{1}{n} \sum_{i=1}^n \Phi(\mathbf{x}_i) [\mathbf{y}_{i,j} - f(\theta_j, \Phi(\mathbf{x}_i))] - \lambda[(1-\alpha)\theta_j + \alpha \text{sign}(\theta_j)] \right) \quad (15)$$

## References

- [1] Friedman J, Hastie T, Tibshirani R. Regularization paths for generalized linear models via coordinate descent. *Journal of statistical software*. 2010;33(1):1.
- [2] Lee JD, Panageas I, Piliouras G, Simchowitz M, Jordan MI, Recht B. First-order Methods Almost Always Avoid Saddle Points. *arXiv preprint arXiv:171007406*. 2017;.
- [3] Yuan GX, Ho CH, Lin CJ. An improved glmnet for l1-regularized logistic regression. *Journal of Machine Learning Research*. 2012;13(Jun):1999–2030.
- [4] Perkins S, Lacker K, Theiler J. Grafting: Fast, incremental feature selection by gradient descent in function space. *Journal of machine learning research*. 2003;3(Mar):1333–1356.
