# Supplementary material for: Metabolic pathway inference using multi-label classification with rich pathway features
Source: PubMed Central journal article supplement (PMC7529316; doi:10.1371/journal.pcbi.1008174), 2020-10-01
Supplement: pcbi.1008174.s002.pdf [file pcbi.1008174.s002.pdf]

# Supplementary - Features Adopted in mLGPR

Abdur Rahman M. A. Basher, Ryan J. McLaughlin, and Steven J. Hallam

Given a set of ECs with abundance information, we define the following four sets of features: i)- reactions evidence features, ii)- pathways evidence features, iii)- pathway common features, and iv)- possible pathways features. Many features were re-designed from the work of Dale et. al [1], and were extracted according to the information available in MetaCyc database [2].

## 1 Reactions Evidence Features

These real-valued features capture various reactions properties that are acquired from samples.

1. **fraction-total-ecs-to-distinct-ecs (numeric)**.  
The fraction of the total number of ECs, present in a sample, to the distinct set of ECs observed in that sample.
2. **fraction-total-possible-pathways-to-distinct-pathways (numeric)**  
The fraction of the total number of possible pathways that could be present in a sample to the distinct set of pathways represented in the total possible pathways.
3. **fraction-total-ecs-to-ecs-mapped-to-single-pathways (numeric)**  
The fraction of the total number of ECs that are associated with single pathways, to the total number of ECs, present in a sample.
4. **fraction-total-ecs-mapped-to-pathways (numeric)**  
The fraction of the total number of ECs, present in a sample, to the total number of pathways that are mapped according to MetaCyc database.
5. **fraction-total-distinct-ecs-contribute-in-subpathway-as-inside-superpathways (numeric)**  
The fraction of the total number of distinct ECs, contributing in pathways that are subpathways to superpathways according to MetaCyc database, to the total number of ECs, present in a sample.
6. **fraction-total-ecs-contribute-in-subpathway-as-inside-superpathways (numeric)**  
The fraction of the total number of ECs, contributing in pathways that are subpathways to superpathways according to MetaCyc database, to the total number of ECs, present in a sample.
7. **fraction-total-distinct-ecs-act-as-initial-reactions (numeric)**  
The fraction of the total number of distinct ECs, contributing at the beginning of pathways, to the total number of ECs, present in a sample.
8. **fraction-total-ecs-act-as-initial-reactions (numeric)**  
The fraction of the total number of ECs, contributing at the beginning of pathways, to the total number of ECs, present in a sample.
9. **fraction-total-distinct-ecs-act-as-final-reactions (numeric)**  
The fraction of the total number of distinct ECs, contributing at the end of pathways, to the total number of ECs, present in a sample.
10. **fraction-total-ecs-act-as-final-reactions (numeric)**  
The fraction of the total number of ECs, contributing at the end of pathways, to the total number of ECs, present in a sample.
11. **fraction-total-distinct-ecs-act-as-initial-and-final-reactions (numeric)**  
The fraction of the total number of distinct ECs, contributing at either the beginning or the end of pathways, to the total number of ECs, present in a sample.
12. **fraction-total-ecs-act-as-initial-and-final-reactions (numeric)**  
The fraction of the total number of ECs, contributing at either the beginning or the end of pathways, to the total number of ECs, present in a sample.

13. **fraction-total-distinct-ecs-act-in-deg-or-detox-pathway (numeric)**  
The fraction of the total number of distinct ECs that act either in degradation or detoxification pathways to the total number of ECs, present in a sample.
14. **fraction-total-ecs-act-in-deg-or-detox-pathway (numeric)**  
The fraction of the total number of ECs that act either in degradation or detoxification pathways to the total number of ECs, present in a sample.
15. **fraction-total-distinct-ec-act-in-biosynthesis-pathway (numeric)**  
The fraction of the total number of distinct ECs that act in biosynthetic pathways to the total number of ECs, present in a sample.
16. **fraction-total-ec-act-in-biosynthesis-pathway (numeric)**  
The fraction of the total number of ECs that act in biosynthetic pathways to the total number of ECs, present in a sample.
17. **fraction-total-distinct-ec-act-in-energy-pathway (numeric)**  
The fraction of the total number of distinct ECs that act in energy pathways to the total number of ECs, present in a sample.
18. **fraction-total-ec-act-in-energy-pathway (numeric)**  
The fraction of the total number of ECs that act in energy pathways to the total number of ECs in a sample, present in a sample.
19. **fraction-total-ecs-to-total-reactions (numeric)**  
The fraction of the total number of ECs to the total number of reactions that are catalyzed by enzymes, encoded as ECs, in a given sample.
20. **fraction-total-distinct-ecs-to-total-distinct-reactions (numeric)**  
The fraction of the total number of distinct ECs to the total number of distinct reactions that are catalyzed by enzymes, encoded as ECs, in a given sample.
21. **fraction-total-ec-contribute-in-unique-reaction (numeric)**  
The fraction of the total number of ECs to the total number of reactions unique to ECs that are catalyzed by enzymes in a given sample.
22. **fraction-total-distinct-ec-contribute-to-reactions-has-taxonomic-range (numeric)**  
The fraction of the total number of distinct ECs that have taxonomic information to the total number of ECs, present in a sample.
23. **fraction-total-pathways-over-total-ecs (numeric)**  
The fraction of the total number of possible pathways that could be present in a sample to the total number of ECs in that sample.
24. **fraction-total-pathways-over-distinct-ec (numeric)**  
The fraction of the total number of possible pathways that could be present in a sample to the total number of distinct ECs in that sample.
25. **fraction-total-distinct-pathways-over-distinct-ec (numeric)**  
The fraction of the total number of distinct possible pathways that could be present in a sample to the total number of distinct ECs in that sample.
26. **fraction-distinct-ec-contributes-in-subpathway-over-distinct-pathways (numeric)**  
The fraction of the total number of distinct ECs, contributing in subpathways, to the total number of distinct possible pathways that could be present in a given sample.
27. **fraction-ec-contributes-in-subpathway-over-total-pathways (numeric)**  
The fraction of the total number of ECs, contributing in subpathways, to the total number of possible pathways that could be present in a given sample.
28. **fraction-distinct-ec-act-in-deg-or-detox-pathway-over-distinct-pathways (numeric)**  
The fraction of the total number of distinct ECs, acting in degradation or detoxification pathways, to the total number of possible distinct pathways that could be present in a given sample.
29. **fraction-distinct-ec-act-in-deg-or-detox-pathway-over-total-pathways (numeric)**  
The fraction of the total number of distinct ECs, acting in degradation or detoxification pathways, to the total number of possible pathways that could be present in a given sample.

30. **fraction-ec-act-in-deg-or-detox-pathway-over-total-pathways (numeric)**  
The fraction of the total number of ECs, acting in degradation or detoxification pathways, to the total number of possible pathways that could be present in a given sample.
31. **fraction-distinct-ec-act-in-biosynthesis-pathway-over-distinct-pathways (numeric)**  
The fraction of the total number of distinct ECs, acting in biosynthetic pathways, to the total number of possible distinct pathways that could be present in a given sample.
32. **fraction-distinct-ec-act-in-biosynthesis-pathway-over-total-pathways (numeric)**  
The fraction of the total number of distinct ECs, acting in biosynthetic pathways, to the total number of possible pathways that could be present in a given sample.
33. **fraction-ec-act-in-biosynthesis-pathway-over-total-pathways (numeric)**  
The fraction of the total number of ECs, acting in biosynthetic pathways, to the total number of possible pathways that could be present in a given sample.
34. **fraction-distinct-ec-act-in-energy-pathway-over-distinct-pathways (numeric)**  
The fraction of the total number of distinct ECs, acting in energy pathways, to the total number of possible distinct pathways that could be present in a given sample.
35. **fraction-distinct-ec-act-in-energy-pathway-over-total-pathways (numeric)**  
The fraction of the total number of distinct ECs, acting in energy pathways, to the total number of possible pathways that could be present in a given sample.
36. **fraction-ec-act-in-energy-pathway-over-total-pathways (numeric)**  
The fraction of the total number of ECs, acting in energy pathways, to the total number of possible pathways that could be present in a given sample.
37. **fraction-total-reactions-over-total-pathways (numeric)**  
The fraction of the total number of reactions, catalyzed by enzymes, encoded as ECs, to the total number of possible pathways that could be present in a given sample.
38. **fraction-total-reactions-over-distinct-pathways (numeric)**  
The fraction of the total number of reactions, catalyzed by enzymes and encoded as ECs, to the total number of possible distinct pathways that could be present in a given sample.
39. **fraction-distinct-reaction-over-distinct-pathways (numeric)**  
The fraction of the total number of distinct reactions, catalyzed by enzymes and encoded as ECs, to the total number of possible distinct pathways that could be present in a given sample.
40. **ecs-in-energy-pathways-mostly-missing (numeric)**  
The total number of energy pathways that have more than half of their true ECs mapping are missing in a given sample.
41. **ecs-in-pathways-mostly-present (numeric)**  
The total number of pathways that have more than half of their true ECs mapping are present while missing only one ECs in a given sample.
42. **all-initial-ecs-present-in-pathways (numeric)**  
The total number of pathways that have at least two of their beginning ECs are present in a given sample.
43. **all-final-ecs-present-in-pathways (numeric)**  
The total number of pathways that have at least two of their final ECs are present in a given sample.
44. **all-initial-and-final-ecs-present-in-pathways (numeric)**  
The total number of pathways that have at least two of their beginning and final ECs are present in a given sample.
45. **all-initial-ecs-present-in-deg-or-detox-pathways (numeric)**  
The total number of degradation or detoxification pathways that have at least two of their beginning ECs are present in a given sample.
46. **all-final-ecs-present-in-deg-or-detox-pathways (numeric)**  
The total number of degradation or detoxification pathways that have at least two of their final ECs are present in a given sample.

47. **all-initial-ecs-present-in-biosynthesis-pathways (numeric)**  
The total number of biosynthetic pathways that have at least two of their beginning ECs are present in a given sample.
48. **all-final-ecs-present-in-biosynthesis-pathways (numeric)**  
The total number of biosynthetic pathways that have at least two of their final ECs are present in a given sample.
49. **most-ecs-absent-in-pathways (numeric)**  
The total number of pathways that have only one of their true ECs mapping is present in a given sample.
50. **most-ecs-absent-not-distinct-in-pathways (numeric)**  
The total number of pathways that have half of their true ECs mapping are not distinct to pathways and missing in a given sample.
51. **one-ec-present-but-in-minority-in-pathways (numeric)**  
The total number of pathways that have only one of their true ECs mapping is present and is considered minority to pathways in a given sample.
52. **all-distinct-ec-present-in-pathways (numeric)**  
The total number of pathways that have all of their true distinct ECs mapping are present in a given sample.
53. **all-ecs-present-in-pathways (numeric)**  
The total number of pathways that have all of their true ECs mapping are present in a given sample.
54. **all-distinct-ec-present-or-orphaned-in-pathways (numeric)**  
The total number of pathways that have all of their true distinct ECs mapping are present or are orphaned according to MetaCyc in a given sample.
55. **all-ec-present-or-orphaned-in-pathways (numeric)**  
The total number of pathways that have all of their true ECs mapping are present or are orphaned according to MetaCyc in a given sample.
56. **majority-of-ecs-absent-in-pathways (numeric)**  
The total number of pathways that have more than half of their true ECs mapping are missing in a given sample.
57. **majority-of-ecs-present-in-pathways (numeric)**  
The total number of pathways that have more than half of their true ECs mapping are present in a given sample.
58. **majority-of-distinct-ecs-present-in-pathways (numeric)**  
The total number of pathways that have more than half of their true distinct ECs mapping are present in a given sample.
59. **majority-of-reactions-present-distinct-in-pathways (numeric)**  
The total number of pathways that have more than half of their true ECs mapping are present and distinct to pathways in a given sample.
60. **missing-at-most-one-ec-in-pathways (numeric)**  
The total number of pathways that have only one of their true ECs mapping is absent in a given sample.
61. **has-distinct-ecs-present-in-pathways (numeric)**  
The total number of pathways that some of their true distinct ECs mapping are present in a given sample.
62. **fraction-distinct-ecs-present-or-orphaned-in-pathways (numeric)**  
The total fraction of distinct ECs or orphaned reactions associated to the possible pathways in a given sample to the pathways true ECs mapping.
63. **fraction-reactions-present-or-orphaned-distinct-in-pathways (numeric)**  
The total fraction of ECs or orphaned reactions that are distinctly associated to possible pathways in a given sample to the pathways true ECs mapping.
64. **fraction-reactions-present-or-orphaned-in-pathways (numeric)**  
The total fraction of ECs or orphaned reactions associated to the possible pathways in a given sample to the pathways true ECs mapping.

65. **num-distinct-reactions-present-or-orphaned-in-pathways (numeric)**  
The total number of distinct ECs or orphaned reactions associated to the possible pathways are present in a given sample.
66. **num-reactions-present-or-orphaned-in-pathways (numeric)**  
The total number of ECs or orphaned reactions associated to the possible pathways are present in a given sample.
67. **evidence-info-content-norm-present-in-pathways (numeric)**  
The total evidence information content of pathways, normalized by the number of reactions associated with pathways that are present in a given sample. For a single pathway  $y_j$  of sample  $\mathbf{x}_i$ , this feature is computed as:

$$evidence = \frac{1}{\sum_{\hat{a} \in \mathbf{y}_j^{(i)}} \hat{a}} \sum_{a \in \mathbf{x}^{(i)}} \frac{1}{\sum_{y_k \in \mathcal{Y}} \sum_{(e, a') \in y_k} \delta(a')} \quad (1)$$

where  $\delta(a') = \begin{cases} 1, & \text{if } a' \geq 1 \text{ and } a' \in \mathbb{N} \\ 0, & \text{otherwise} \end{cases}$

where  $\mathcal{Y}$  represents the universal set of pathways while  $e$  represents an EC and  $a$ ,  $a'$  and  $\hat{a}$  are abundances in  $\mathbf{x}^{(i)}$ ,  $y_k$ , and  $\mathbf{y}_j^{(i)}$ , respectively and are elements in  $\mathbb{N}$ . This feature measures how strongly the evidence for the pathway  $j$  based on ECs. The ECs contributing to many pathways have low evidence for the presence of the reactions that EC catalyze.

68. **evidence-info-content-present-in-pathways (numeric)**  
The total evidence information content of pathways in a given sample.

## 2 Pathways Evidence Features

These features are designed to capture simple patterns for each pathway from samples. They are combination of two types: boolean and numeric.

1. **ecs-mostly-present-in-pathway (boolean)**  
True if a pathway is: a)- missing at most one EC and b)- half of its ECs is present.
2. **prob-ecs-mostly-present-in-pathway (numeric)**  
The fraction of the total number of ECs associated to a pathway, present in a sample, to the true ECs mapping of that pathway, satisfying two conditions: a)- missing at most one EC and b)- half of that pathway's ECs is present.
3. **all-initial-ecs-present-in-pathway (boolean)**  
True if the first two ECs associated to a pathway are present in a sample.
4. **prob-initial-ecs-present-in-pathway (numeric)**  
The fraction of the first two ECs associated to a pathway, if present in a sample, to the first two true ECs mapping of that pathway.
5. **all-final-ecs-present-in-pathway (boolean)**  
True if the last two ECs associated to a pathway are present in a sample.
6. **prob-final-ecs-present-in-pathway (numeric)**  
The fraction of the last two ECs associated to a pathway, if present in a sample, to the last two true final ECs mapping of that pathway.
7. **all-initial-and-final-ecs-present-in-pathway (boolean)**  
True if the first two and the last two ECs associated to a pathway are present in a sample.
8. **prob-all-initial-and-final-ecs-present-in-pathway (numeric)**  
The fraction of the first two and the last two ECs associated to a pathway, if present in a sample, to the first two and the last two true ECs mapping of that pathway.
9. **all-initial-ecs-present-in-deg-or-detox-pathway (boolean)**  
True if the first two ECs associated to a degradation or a detoxification pathway are present in a sample.

10. **prob-all-initial-ecs-present-in-deg-or-detox-pathway (numeric)**  
The fraction of the first two ECs associated to a degradation or a detoxification pathway, if present in a sample, to the first two true ECs mapping of that pathway.
11. **all-initial-ecs-present-in-biosynthesis-pathway (boolean)**  
True if the first two ECs associated to a biosynthetic pathway are present in a sample.
12. **prob-all-initial-ecs-present-in-biosynthesis-pathway (numeric)**  
The fraction of the first two ECs associated to a biosynthetic pathway, if present in a sample, to the first two true ECs mapping of that pathway.
13. **most-ecs-absent-in-pathway (boolean)**  
True if only one EC associated to a pathway is present in a sample.
14. **most-ecs-absent-not-distinct-in-pathway (boolean)**  
True if half of ECs associated to a pathway in a sample is not distinct to that pathway.
15. **one-ec-present-but-in-minority-in-pathway (boolean)**  
True if only one EC associated to a pathway is present in a sample and is considered a minority to that pathway.
16. **all-distinct-ec-present-in-pathway (boolean)**  
True if all distinct ECs associated to a pathway are present in a sample.
17. **all-ecs-present-in-pathway (boolean)**  
True if all ECs associated to a pathway are present in a sample.
18. **all-distinct-ec-present-or-orphaned-in-pathway (boolean)**  
True if all distinct ECs associated to a pathway are present in a sample or orphaned according to MetaCyc.
19. **all-ec-present-or-orphaned-in-pathway (boolean)**  
True if all ECs associated to a pathway are present in a sample or orphaned according to MetaCyc.
20. **majority-of-ecs-absent-in-pathway (boolean)**  
True if more than half of ECs associated to a pathway in a sample are missing.
21. **majority-of-ecs-present-in-pathway (boolean)**  
True if more than half of ECs associated to a pathway in a sample are present.
22. **majority-of-distinct-ecs-present-in-pathway (boolean)**  
True if more than half of distinct ECs associated to a pathway in a sample are present.
23. **majority-of-reactions-present-distinct-in-pathway (boolean)**  
True if more than half of ECs associated to a pathway in a sample are present and distinct to that pathway.
24. **missing-at-most-one-ec-in-pathway (boolean)**  
True if only one EC associated to a pathway in a sample is missing.
25. **has-distinct-ecs-present-in-pathway (boolean)**  
True if some distinct ECs associated to a pathway in a sample are present.
26. **fraction-distinct-ecs-present-or-orphaned-in-pathway (numeric)**  
The fraction of distinct ECs or orphaned reactions associated to a pathway in a sample.
27. **fraction-reactions-present-or-orphaned-distinct-in-pathway (numeric)**  
The fraction of ECs or orphaned reactions that are distinctly associated to a pathway in a sample.
28. **fraction-reactions-present-or-orphaned-in-pathway (numeric)**  
The fraction of ECs or orphaned reactions associated to a pathway in a sample.
29. **num-distinct-reactions-present-or-orphaned-in-pathway (numeric)**  
The number of distinct ECs or orphaned reactions associated to a pathway is present in a sample.
30. **num-reactions-present-or-orphaned-in-pathway (numeric)**  
The number of ECs or orphaned reactions associated to a pathway is present in a sample.
31. **evidence-info-content-norm-present-in-pathway (numeric)**  
The total evidence information content of a pathway, normalized by the number of reactions associated with that pathways which are present in a sample.
32. **evidence-info-content-present-in-pathway (numeric)**  
The total evidence information content of a pathway in a sample.

### 3 Pathway Common Features

This feature set is designed to recognize (mis-)matches between a list of ECs from samples and the true mappings of pathways to ECs.

1. **ec-pathway-common-present (boolean)**

### 4 Possible Pathways Features

This feature set is of two types: i)- a boolean representation indicating the presence/absence of pathways in samples that exceed a user-defined cutoff threshold (0.5 in our setting), and ii)- a numerical representation encoding the probabilities of pathways to be present in samples.

1. **possible-pathways-present (boolean)**
2. **prob-possible-pathways-present (numeric)**

## References

- [1] Dale JM, Popescu L, Karp PD. Machine learning methods for metabolic pathway prediction. *BMC bioinformatics*. 2010;11(1):1.
- [2] Caspi R, Billington R, Ferrer L, Foerster H, Fulcher CA, Keseler IM, et al. The MetaCyc database of metabolic pathways and enzymes and the BioCyc collection of pathway/genome databases. *Nucleic Acids Research*. 2016;44(D1):D471–D480.
